# Supplementary material
Source: Research Square preprint supplement (doi:10.21203/rs.3.rs-9418989/v1)
Supplement: Supplementary file 1 [file 3ca7a96ab78d2b8dd5e636a3.docx]

**S1 – Temporal Configuration of EF Digital Tools**

**Table S1**

*Temporal Configuration of the Digital Executive Function Test Battery Employed in This Study*

| Test | Stimulus Duration | Response Window | ISI | Feedback | Trials / Blocks |
| --- | --- | --- | --- | --- | --- |
| Digit Span(a) | 700 ms per digit | Self-paced or 15 s | 300 ms | No | 2 per sequence (2–9 digits) |
| N-back (2-back)(b) | 500 ms | During ISI (2000 ms) | 2000 ms | No | 6 blocks of 36 trials |
| Backwards Corsi(c) | 1000 ms per block | Up to 20 s | 500 ms | Optional | 2 per sequence length (2–8) |
| Stroop(d) | 1000 ms | Up to 1500 ms | 1000 ms ± 200 ms | No | 30–40 per condition |
| Go-NoGo(e) | 300–400 ms | Up to 800 ms | 1000 ms ± 200 ms | No | 160 trials (20% NoGo) |
| Wisconsin Card Sorting Test(f) | Until response | Up to 3000 ms | 1000–1500 ms | 800 ms | Up to 128 trials |
| Task Switching(g) | CSI: 300–600 ms | Up to 2000 ms | RCI: 200–500 ms | No | Switch and repeat trials |
| Iowa Gambling Task(h) | Self-paced | Self-paced | 500 ms after feedback | Immediate after choice | 100 selections |

Note: ISI = interstimulus interval; CSI = cue-stimulus intervalk; RCI = response-cue interval.

(a) Jonas & Macken (2015); (b) Usa consoantes “B, F, K, L, H, M, P, R, T, V, X, Y”; Kane et al. (2007); (c) Santana et al. (2021) and Kessels (2008); (d) MacLeod (1991), Campanholo et al. (2014), and Zimmermann et al. (2015); (e) Criaud & Boulinguez (2013) and Verbruggen & Logan (2008); (f) Nyhus & Barceló (2009) and Zimmermann et al. (2015); (g) Monsell (2003) and Vandierendonck et al. (2010); (h) Bechara et al. (1994) and Malloy-Diniz et al. (2008).

**Reasons for the temporal configurations of the EF test battery employed in this Study**

**Digit Span Task**

This test was implemented following the parameters described by Jones and Macken (2015), who used a fully digital format with digits displayed visually for 700 milliseconds each, separated by 300-millisecond intervals. Participants respond via mouse click in the correct sequence. This approach allows for complete temporal control and aligns with best practices for computerized assessment of short-term memory in literate, cognitively healthy adults.

**N-back Task**

The 2-back task adopted in this study follows the digital structure proposed by Kane et al. (2007), in which stimuli are presented for 500 milliseconds followed by a 2000-millisecond interstimulus interval (ISI). Participants respond during the ISI, resulting in a total trial time of 2500 milliseconds. This configuration effectively balances cognitive load and attentional control and is well-suited to adults with high educational attainment. The reference study used a university sample comparable in cognitive profile to the current target population.

**Backwards Corsi Block-Tapping Test**

The temporal configuration of the Corsi task was adapted from Kessels et al. (2008), with support from normative data in Santana et al. (2021). Blocks were highlighted sequentially for 1000 milliseconds with a 500-millisecond inter-block interval. Participants reproduced the sequence in reverse order using a digital interface. This configuration maintains task fidelity while optimizing response capture and standardization in digital environments.

**Stroop Test**

This test was implemented in line with the theoretical model by MacLeod (1991) and validated for Brazilian adults by Campanholo et al. (2014) and Zimmermann et al. (2015). Stimuli were shown for 1000 milliseconds, with responses collected for up to 1500 milliseconds. A jittered ISI of 1000 ± 200 milliseconds was included to minimize predictability. This setup supports precise measurement of the Stroop interference effect, particularly suitable for well-educated adult samples.

**Go–NoGo Task**

The Go–NoGo task configuration was based on evidence from Verbruggen and Logan (2008) and Criaud and Boulinguez (2013). The stimulus duration was set to 300–400 milliseconds, with a maximum response time of 800 milliseconds and a jittered ISI of 1000 ± 200 milliseconds. These settings are optimized to induce prepotent motor responses and engage inhibitory control mechanisms, particularly in highly educated participants.

**Wisconsin Card Sorting Test (WCST)**

Temporal features of the WCST were informed by Nyhus and Barceló (2009), who discuss response latency and feedback processing in cognitive control tasks. Responses were allowed up to 3000 milliseconds, followed by 800 milliseconds of feedback and a 1000–1500-millisecond intertrial interval. These parameters preserve the executive demands of the original task while adapting it to a digital platform for highly educated participants.

**Task Switching Test**

Configuration was grounded in the models proposed by Monsell (2003) and Vandierendonck et al. (2010). A cue–stimulus interval (CSI) of 300–600 milliseconds and a response–cue interval (RCI) of 200–500 milliseconds were adopted to balance task preparation and set dissipation. Participants had up to 2000 milliseconds to respond. This arrangement supports the isolation of switch costs and is suited for digital delivery to cognitively capable adults.

**Iowa Gambling Task (IGT)**

The IGT was structured according to the original protocol developed by Bechara et al. (1994) and adapted to Brazilian Portuguese by Malloy-Diniz et al. (2008). Participants made 100 self-paced selections from four decks, each followed by immediate feedback on gains and losses. A fixed 1000-millisecond intertrial interval was implemented to stabilize feedback processing. This configuration preserves the ecological validity of the task and enables the assessment of decision-making under uncertainty in adult populations with high cognitive function.
