# Supplementary material
Source: Research Square preprint supplement (doi:10.21203/rs.3.rs-9418989/v1)
Supplement: Supplementary file 2 [file 6be0e1e34ce940e5eacf3b71.xlsx]

## Sheet: Experiment control
S2 - Participant recruitment waves, eligibility status, protocol completion, and analytical inclusion
Participant	Recruitment wave	MMSE	Elegible (MMSE ≥ 24)	Completed Protocol	Included in analysis
P01	5	29	Y	N	N
P02	2	29	Y	Y	Y
P03	2	30	Y	Y	Y
P04	3	29	Y	Y	Y
P05	2	30	Y	Y	Y
P06	1	28	Y	Y	Y
P07	2	28	Y	N	N
P08	1	25	Y	Y	Y
P09	4	26	Y	Y	Y
P10	2	28	Y	Y	Y
P11	1	26	Y	N	N
P12	2	28	Y	Y	Y
P13	1	29	Y	Y	Y
P14	1	30	Y	Y	Y
P15	1	30	Y	Y	Y
P16	2	26	Y	Y	Y
P17	2	25	Y	Y	Y
P18	2	30	Y	Y	Y
P19	2	27	Y	Y	Y
P20	1	30	Y	Y	Y
P21	1	30	Y	Y	Y
P22	1	26	Y	N	N
P23	2	29	Y	Y	Y
P24	2	28	Y	Y	Y
P25	2	30	Y	Y	Y
P26	3	30	Y	Y	Y
P27	3	28	Y	Y	Y
P28	1	28	Y	N	N
P29	1	30	Y	Y	Y
P30	2	26	Y	Y	Y
P31	3	29	Y	Y	Y
P32	3	28	Y	Y	Y
P33	3	25	Y	N	N
P34	3	29	Y	Y	Y
P35	1	29	Y	Y	Y
P36	2	25	Y	Y	Y
P37	3	24	Y	N	N
P38	1	30	Y	N	N
P39	1	27	Y	Y	Y
P40	3	30	Y	Y	Y
P41	1	30	Y	Y	Y
P42	3	30	Y	Y	Y
P43	3	29	Y	Y	Y
P44	1	27	Y	N	N
P45	4	28	Y	Y	Y
P46	2	30	Y	N	N
P47	2	28	Y	Y	Y
P48	3	28	Y	Y	Y
P49	3	30	Y	Y	Y
P50	1	25	Y	N	N
P51	4	26	Y	Y	Y
P52	3	28	Y	Y	Y
P53	2	29	Y	Y	Y
P54	3	25	Y	N	N
P55	1	24	Y	Y	Y
P56	1	29	Y	Y	Y
P57	2	29	Y	Y	Y
P58	1	26	Y	Y	Y
P59	4	28	Y	Y	Y
P60	4	28	Y	Y	Y
P61	2	30	Y	Y	Y
P62	2	29	Y	Y	Y
P63	2	29	Y	Y	Y
P64	4	28	Y	Y	Y
P65	1	30	Y	Y	Y
P66	2	28	Y	Y	Y
P67	2	28	Y	Y	Y
P68	4	29	Y	Y	Y
P69	1	30	Y	Y	Y
P70	2	28	Y	Y	Y
P71	2	24	Y	Y	Y
P72	2	28	Y	Y	Y
P73	2	26	Y	Y	Y
P74	2	30	Y	Y	Y
P75	4	28	Y	Y	Y
P76	5	27	Y	Y	Y
P77	5	29	Y	Y	Y
P78	1	30	Y	Y	Y
P79	2	29	Y	Y	Y
P80	2	29	Y	Y	Y
P81	2	28	Y	Y	Y
P82	1	29	Y	Y	Y
Summary		k
Eligible based on MMSE		82
Completed full protocol		70
Included in final analysis		70
Note. Eligibility was determined based on MMSE scores (cutoff ≥ 24). “Completed Protocol” indicates participants who completed all study tasks. “Included in Analysis” refers to participants retained in the final analytical sample.
