# Supplementary material
Source: Research Square preprint supplement (doi:10.21203/rs.3.rs-9418989/v1)
Supplement: Supplementary file 2 [file a38d2f1eb7690e8025025df7.docx]

# S3 — Task-level descriptive diagnostics and validity criteria

Descriptive statistics for the main study variables are presented in Supplementary Table S3. Executive-function (EF) composite scores, socio-emotional and behavioral (SEB) skills, and transformational leadership attitudes (TLA) showed adequate variability and broadly acceptable distributional properties. Skewness and kurtosis values remained within commonly accepted ranges, supporting the use of parametric inferential procedures in the primary analyses.

## Executive Functions

### Working memory (WM)

Working memory was assessed using the Digit Span composite and the N-back composite. All participants who completed the protocol demonstrated valid performance in the Digit Span task (N = 70), with no evidence of disengagement or implausible response patterns. The Digit Span composite showed broadly acceptable distributional properties (skewness = −0.16; kurtosis = −0.77).

For the N-back task, task-specific validity criteria were applied prior to analysis. Participants with corrected hit rates below .20 were excluded, as this threshold indicates insufficient target detection in 2-back paradigms. One additional case was removed due to incomplete task execution, and one participant with performance at or below chance level (d’ ≤ 0) was also excluded. After applying these criteria, the final valid sample for the N-back analyses comprised N = 61 participants. The N-back composite also showed acceptable distributional characteristics (skewness = −0.48; kurtosis = 0.17).

To obtain an overall indicator of working memory, the standardized scores from both tasks were averaged to create the WM composite. Both task indicators were strongly associated with the composite score (Digit Span: r = .76, p < .001; N-back: r = .63, p < .001). The resulting composite showed broadly adequate distributional properties (skewness = −0.23; kurtosis = −0.41), with observed values ranging from −1.37 to 1.36.

**Supplementary Table S3**

*Descriptive Statistics of Study Variables*

| Variable | N | Mean | SD | Skewness | Kurtosis |
| --- | --- | --- | --- | --- | --- |
| Demographics |  |  |  |  |  |
| - age | 70 | 48.97 | 7.37 | 0.50 | 0.60 |
| - Education levela | 70 | 2.80 | 0.91 | 0.06 | -1.19 |
| EF - WM |  |  |  |  |  |
| - Digit span composite | 70 | 0.00 | 0.96 | -0.16 | -0.77 |
| - Nback-2back composite | 61 | 0.00 | 0.78 | -0.48 | 0.17 |
| - WM composite | 61 | -0.02 | 0.60 | -0.23 | -0.41 |
| EF - IC |  |  |  |  |  |
| - Stroop composite | 57 | 0.00 | 0.57 | 0.05 | -0.43 |
| - Go/NoGo composite | 69 | 0.00 | 0.65 | -0.53 | 0.06 |
| - IC composite | 56 | 0.00 | 0.47 | -0.57 | 0.86 |
| EF - DM |  |  |  |  |  |
| - DM composite | 70 | 0.00 | 0.91 | 0.38 | -0.44 |
| EF – CFb (exploratory) |  |  |  |  |  |
| - WCST composite | 70 | 0.00 | 0.36 | -0.39 | 0.54 |
| - Task-Switching composite | 70 | 0.00 | 0.53 | -0.59 | -0.18 |
| - CF composite | 70 | 0.00 | 0.32 | -0.21 | -0.49 |
| SEB |  |  |  |  |  |
| - SE | 70 | 0.00 | 1.00 | -0.57 | 0.34 |
| - ER | 70 | 0.00 | 1.00 | -0.20 | -0.49 |
| Outcome |  |  |  |  |  |
| - TLA | 70 | 0.00 | 1.00 | -0.53 | -0.46 |

*Note*. WM composite = average of Digit Span and N-back standardized scores; IC composite = average of Stroop and Go/NoGo standardized scores; DM = decision-making composite derived from the Iowa Gambling Task; CF composite = average of WCST and Task-Switching standardized scores; SE = social engagement; ER = emotional resilience; TLA = transformational leadership attitudes.

aEducation level coded from 1 (Bachelor’s degree) to 4 (Doctoral degree).

b CF was examined as an exploratory EF component.

### Inhibitory Control

IC was assessed using the Stroop composite and the Go/NoGo composite. Data were screened for engagement and task-comprehension criteria, including minimum valid trials, accuracy thresholds, and plausible response times. After data screening, the final sample for IC analyses comprised N = 69 participants.

For the Stroop task, the interference composite showed broadly acceptable distributional properties (skewness = 0.05; kurtosis = −0.43), with no extreme outliers. Participants responded more slowly and less accurately in incongruent trials than in congruent trials, reflecting the expected Stroop interference effect.

For the Go/NoGo task, one extreme outlier in the inhibitory control composite (|z| > 3) was removed. Across participants, mean Go reaction time was 282 ms (SD = 40.50), with high hit rates (M = .92) and low false alarm rates (M = .07), indicating strong response discrimination and task engagement. The Go/NoGo composite also showed acceptable distributional characteristics (skewness = −0.53; kurtosis = 0.06).

To obtain an overall indicator of inhibitory control, the standardized scores from both tasks were averaged to create the IC composite. Both task indicators were strongly associated with the composite score (Stroop: r = .70, p < .001; Go/NoGo: r = .79, p < .001). The resulting composite showed broadly adequate distributional properties (skewness = −0.57; kurtosis = 0.86), with observed values ranging from −1.39 to 1.06.

### Decision Making

Decision making was assessed using the IGT composite. All participants who completed the protocol provided complete IGT data, resulting in a final analytical sample of N = 70.

Performance was summarized using a standardized composite score integrating the IGT net performance and a learning index reflecting improvement across task blocks. Descriptive analyses indicated moderately asymmetric but theoretically expected distributional properties for reinforcement-learning paradigms (skewness = 0.38; kurtosis = −0.44). Observed scores ranged from −1.96 to 1.89, and no extreme outliers were identified.

### Cognitive Flexibility

CF was assessed using two computerized indicators capturing complementary aspects of flexible cognitive control: the WCST composite (rule/set shifting) and the Task-Switching composite (set alternation). All participants who completed the protocol provided valid data for both indicators, resulting in a final analytical sample of N = 70.

Descriptive analyses indicated broadly acceptable distributional properties for both CF indicators. The WCST composite showed slight negative asymmetry (skewness = −0.39; kurtosis = 0.54), whereas the Task-Switching composite showed moderate negative asymmetry (skewness = −0.59; kurtosis = −0.18).

To obtain an overall exploratory indicator of cognitive flexibility, the standardized scores from both tasks were averaged to create a composite CF score. The resulting composite showed generally symmetric distributional properties (skewness = −0.21; kurtosis = −0.49), with observed values ranging from −0.77 to 0.70, and no extreme outliers were identified..

### Social, emotional, and behavioral Skills

Descriptive analyses indicated relatively high levels of SEB skills in the sample. On the original five-point response scale, mean scores ranged from 3.83 (ER) to 4.25 (Cooperation), with an overall SEB mean of 4.00 (SD = 0.43), suggesting generally elevated social, emotional, and behavioral competence among participants.

For the purposes of the inferential analyses, the SE composite and the ER composite were standardized (z-scores) and used as predictors in the regression models. Both indicators showed broadly acceptable distributional properties (SE: skewness = −0.57; kurtosis = 0.34; ER: skewness = −0.20; kurtosis = −0.49), consistent with the assumption that meaningful individual differences in SEB skills would be observable within the sample.

### Transformational Leadership Attitudes

Descriptive statistics indicated relatively high endorsement of TLA in the sample. The mean score was 6.39 (SD = 0.38) on the seven-point response scale, with observed values ranging from 5.49 to 7.00.

For the inferential analyses, the TLA composite was standardized (z-score). The distribution showed modest asymmetry but remained within acceptable limits for parametric analyses (skewness = −0.53; kurtosis = 0.46), with standardized values ranging from −2.37 to 1.59. Variability across participants was considered sufficient to support the planned regression models.

Complete descriptive statistics for all EF components, SEB skills, and TLA indicators are provided in the online supplementary materials. The following analyses examine the associations among these variables and their joint contribution to TLA.
